# Supplementary material for: Chemical sensors based on a Eu(iii)-centered periodic mesoporous organosilica hybrid material using picolinic acid as an efficient secondary ligand
Source: Royal Society of Chemistry journal article supplement (doi:10.1039/d1dt01767e), 2021-01-01
Supplement: d1dt01767e1.pdf [file d1dt01767e1.pdf]

# Chemical sensors based on a Eu (III)-centered Periodic Mesoporous Organosilica hybrid material using picolinic acid as an efficient secondary ligand

Wanlu Liu <sup>a b c</sup>, Anna M. Kaczmarek\* <sup>b</sup>, Hannes Rijckaert <sup>d</sup>, Pascal Van Der Voort <sup>c</sup>, Rik Van Deun\* <sup>a</sup>

<sup>a</sup> L<sup>3</sup> – Luminescent Lanthanide Lab, Department of Chemistry, Ghent University, Krijgslaan 281-S3, 9000 Ghent, Belgium.

<sup>b</sup> NanoSensing Group, Department of Chemistry, Ghent University, Krijgslaan 281-S3, 9000 Ghent, Belgium.

<sup>c</sup> Center for Ordered Materials, Organometallics and Catalysis (COMOC), Department of Chemistry, Ghent University, Krijgslaan 281-S3, 9000 Ghent, Belgium.

<sup>d</sup> SCRiPTS, Department of Chemistry, Ghent University, Krijgslaan 281-S3, 9000 Ghent, Belgium.

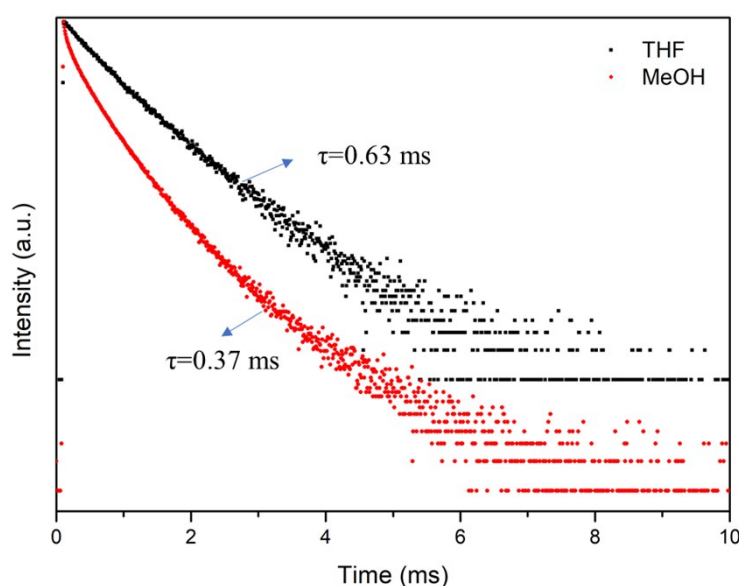

**Figure S1** Decay profiles of ePMO@Eu\_PA prepared in THF or methanol.

**Table S1** CHN analysis results of ePMO and its variant materials.

| Sample        | C (wt%) | H (wt%) | N (wt%) |
|---------------|---------|---------|---------|
| ePMO          | 17.67   | 2.95    | 0.14    |
| Am-ePMO       | 13.43   | 2.79    | 3.06    |
| Am-ePMO@o-van | 11.51   | 1.93    | 5.39    |
| ePMO@Eu_PA    | 19.42   | 2.10    | 5.94    |

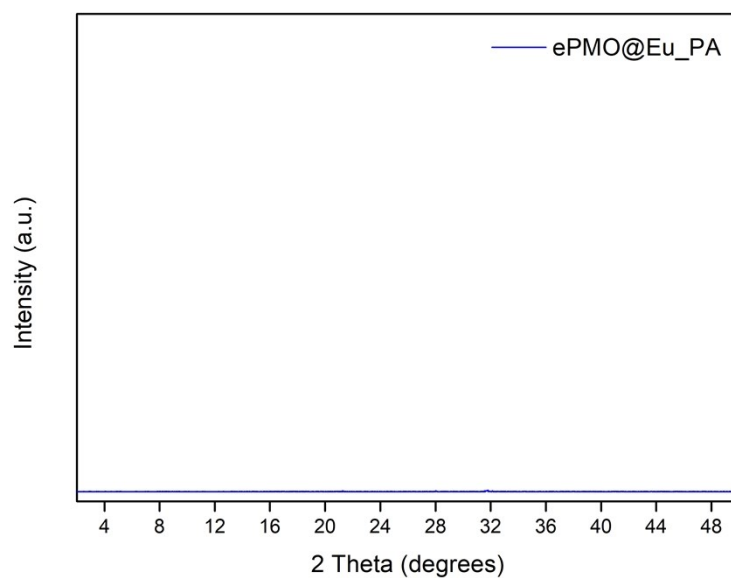

**Figure S2** High angle powder XRD pattern of ePMO@Eu\_PA.

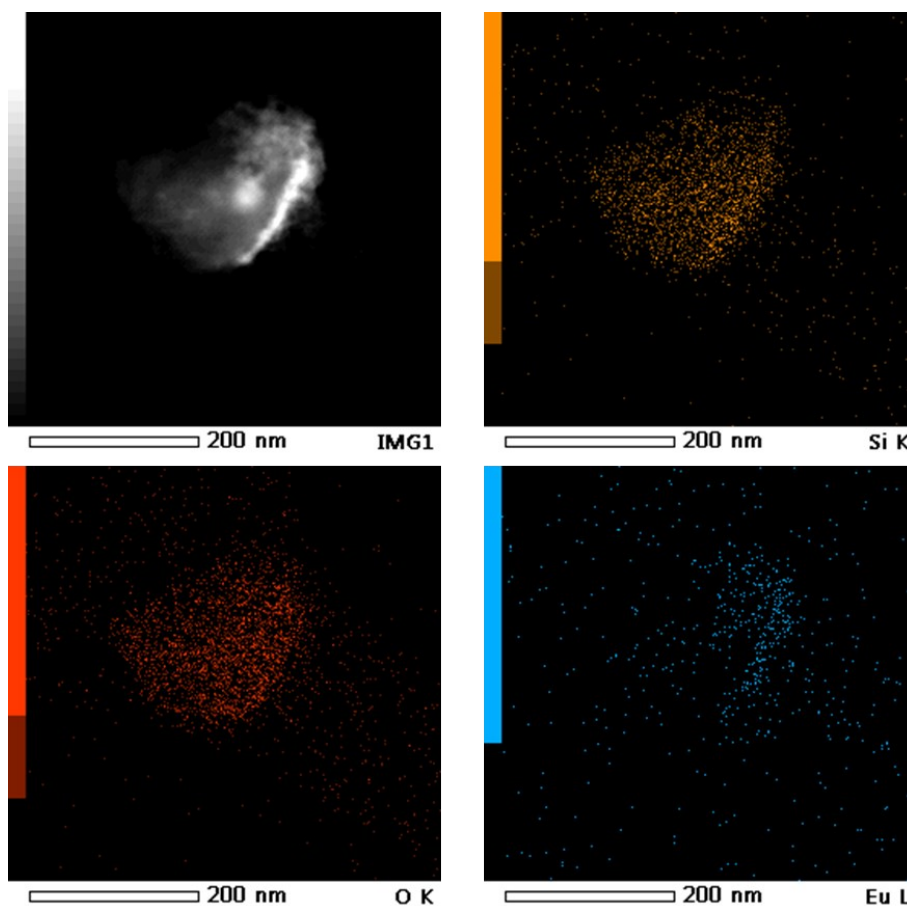

**Figure S3** TEM-EDX mapping of ePMO@Eu\_PA for the following elements: Si, O, Eu (from top to bottom, left to right).

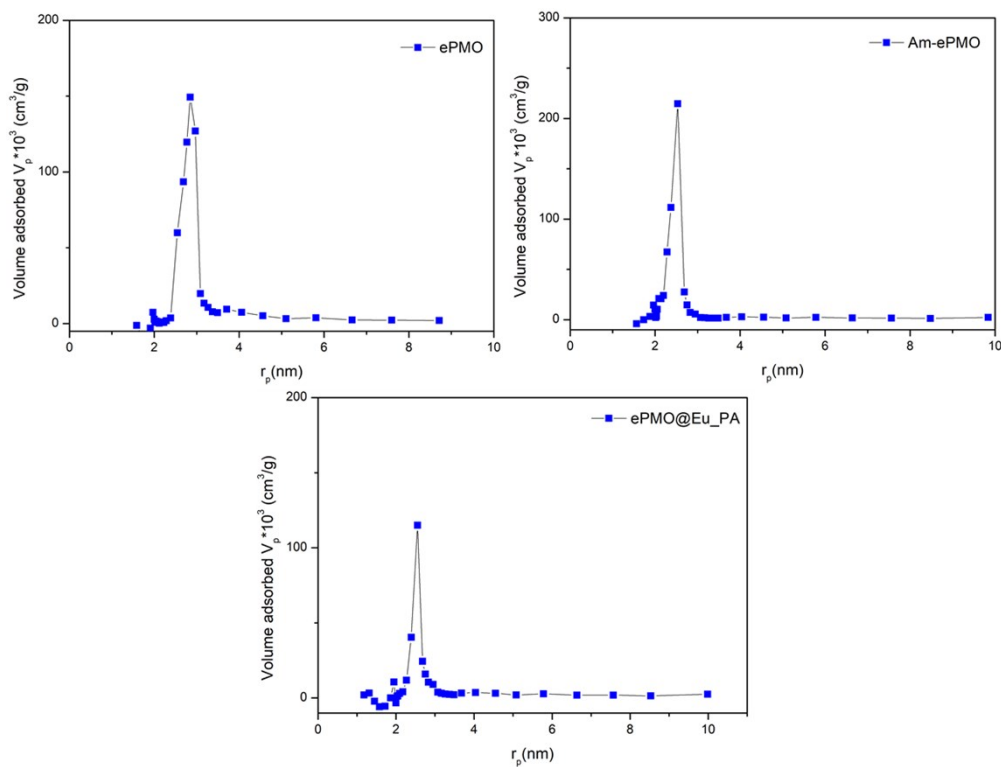

**Figure S4** BJH pore size distribution of PMO materials: ePMO, Am-ePMO and ePMO@Eu\_PA (from top to bottom).

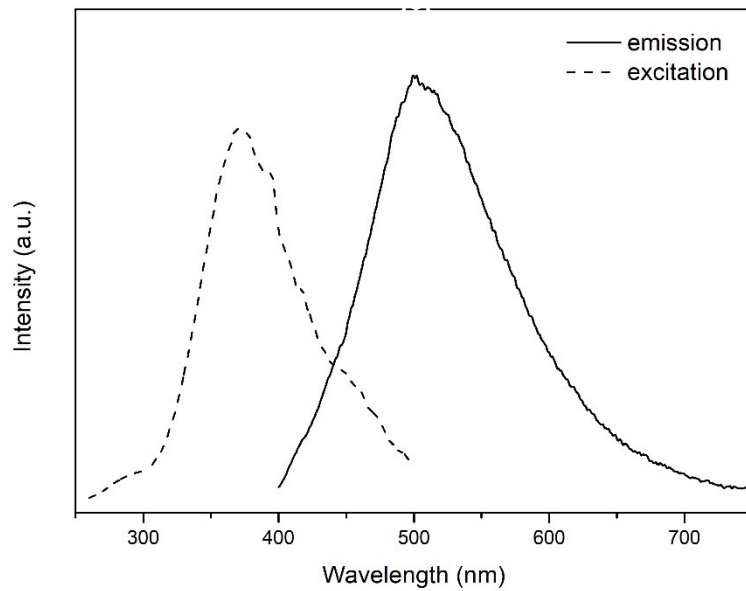

**Figure S5** RT combined excitation-emission spectrum of Am-ePMO@o-van (the dashed line represents the excitation spectrum. The continuous line represents the emission spectrum).

**Table S2** Assignment of peaks labeled in Figure 2 (in the main text).

| Label      | Wavelength (nm) | Transitions               |
|------------|-----------------|---------------------------|
| Excitation |                 |                           |
| a          | 277             | $\pi^* \leftarrow \pi$    |
| b          | 316             | $^5H_3 \leftarrow ^7F_0$  |
| c          | 359             | $^5D_4 \leftarrow ^7F_0$  |
| d          | 375             | $^5L_7 \leftarrow ^7F_0$  |
| e          | 392             | $^5L_6 \leftarrow ^7F_0$  |
| Emission   |                 |                           |
| f          | 578             | $^5D_0 \rightarrow ^7F_0$ |
| g          | 591             | $^5D_0 \rightarrow ^7F_1$ |
| h          | 615             | $^5D_0 \rightarrow ^7F_2$ |
| i          | 649             | $^5D_0 \rightarrow ^7F_3$ |
| j          | 699             | $^5D_0 \rightarrow ^7F_4$ |

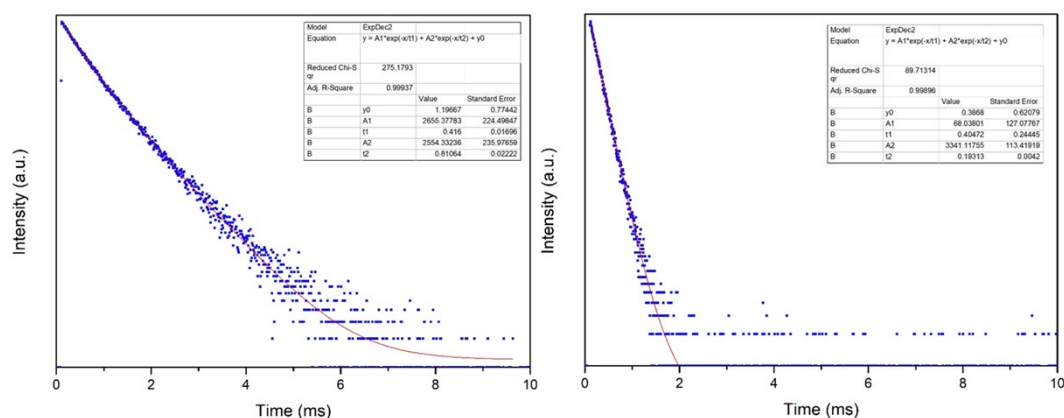

**Figure S6** Left: decay profile of ePMO@Eu\_PA in solid-state form; right: decay profile of ePMO@Eu\_PA in aqueous suspension.

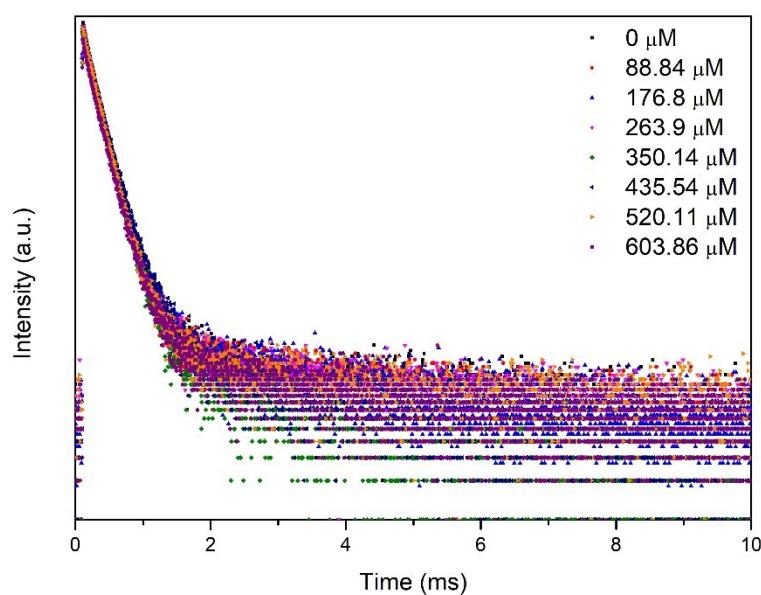

**Figure S7** Luminescence decay times of an aqueous suspension of ePMO@Eu\_PA

observed at different concentrations of  $\text{Fe}^{3+}$ .

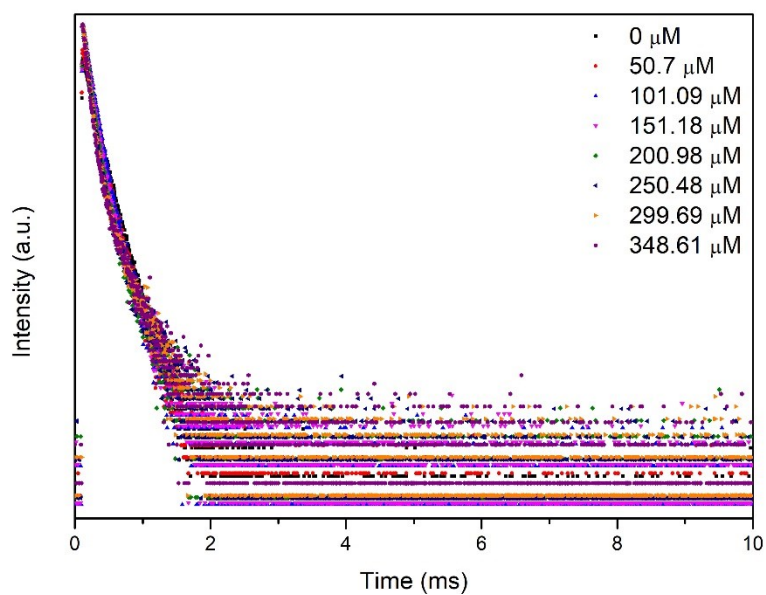

**Figure S8** Luminescence decay times of an aqueous suspension of ePMO@Eu\_PA observed at different concentrations of  $\text{Co}^{2+}$ .

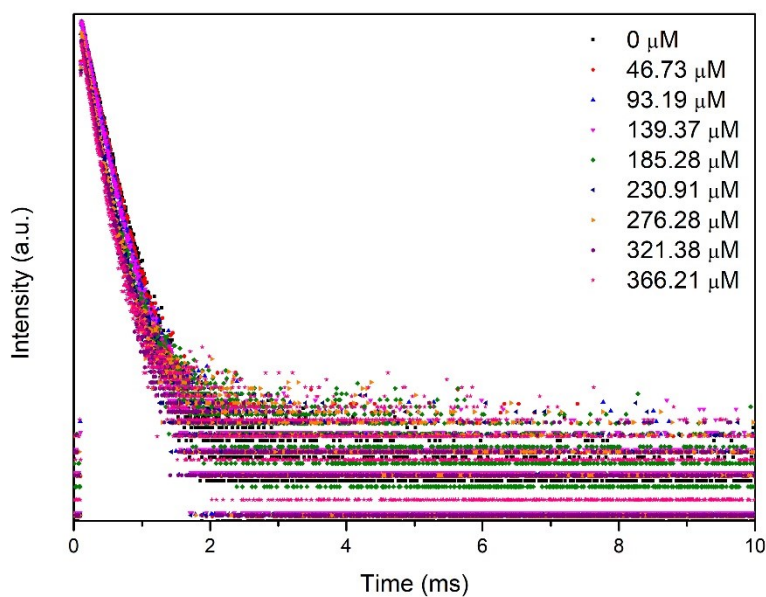

**Figure S9** Luminescence decay times of an aqueous suspension of ePMO@Eu\_PA observed at different concentrations of  $\text{Cu}^{2+}$ .

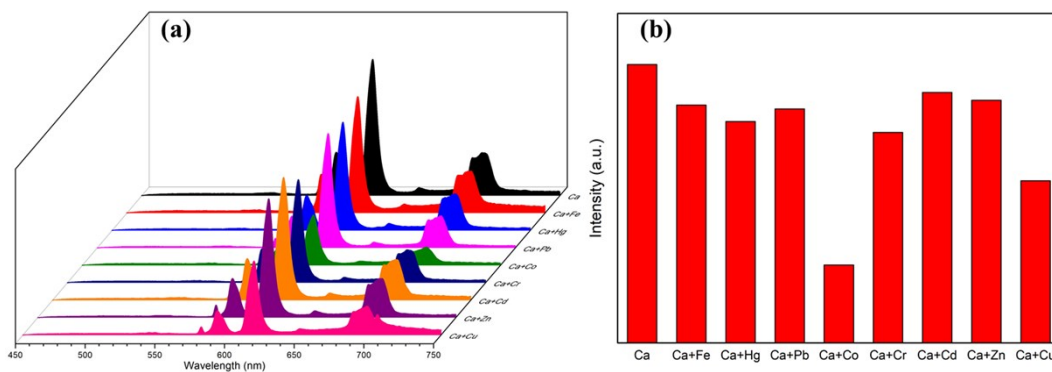

**Figure S10** (a) Emission spectra and (b) emission intensity of the  $^5D_0 \rightarrow ^7F_2$  transition peak of ePMO@Eu\_PA in the presence of  $Ca^{2+}$  and competing ions. (The mixed solution contains: 1 mg ePMO@Eu\_PA /1 mL water; 20  $\mu$ L  $Ca^{2+}$  (1000 ppm) and 20  $\mu$ L competing ions (1000 ppm)).

### S1. Limit of Detection (LOD) for $Ca^{2+}$ , $Fe^{3+}$ , $Co^{2+}$ and $Cu^{2+}$

The blank suspensions were prepared by immersing 1 mg of ePMO@Eu\_PA in 1 mL water (LOD calculation for  $Fe^{3+}$ ,  $Co^{2+}$  and  $Cu^{2+}$ ). The blank suspension for  $Ca^{2+}$  was prepared by immersing 1 mg of ePMO@Eu\_PA in 200  $\mu$ L water. The suspensions with different metal ion concentrations were prepared by adding different volume of metal ion nitrate solutions (1000 ppm) to the blank suspensions for the determination of limit of detection.

Limit of detection (LOD) was calculated using the plots of concentration versus and fluorescence intensity in Figure 5. Limit of detection was calculated using the below equation.

$$LOD = 3\sigma/k$$

Where  $\sigma$  stands for the standard deviation of 3 blank fluorescence intensities,  $k$  stands for the slope of the graph (S-V curve). Here,  $k$  can be calculated by using Stern–Volmer (S-V) equation:  $I_0/I = K_{SV}C+1$ . The fitted curves and calculated LOD results are displayed in Figure 5 and Table 1 in the main text.

### S2. Recyclability and stability of ePMO@Eu\_PA

Given the importance of recyclability in practical applications, a fast and simple method of recycling as metal ion sensor ( $Co^{2+}$  was selected as an example) as well as pH sensor was measured.

For the metal ion sensing experiment, ePMO@Eu\_PA was soaked in the  $Co^{2+}$  solution for a few minutes for the first quenching experiment. Afterward, the powder of ePMO@Eu\_PA was centrifuged and washed several times with distilled water and dried at 80°C. The recovered solid was collected and then used in the successive quenching experiments (four times). For the pH sensing experiment, the recyclability was examined by cyclic detection of pH at pH 7.73 and 10.23. After each treatment, the sample was centrifuged and washed with distilled water, and finally dried in an oven at 80°C.

After each experiment, the recovered sample (in solid-state) was placed under a UV lamp (302 nm illumination) to observe the color change. Eventually, the final

recovered samples were characterized by PXRD and DRIFTS to evaluate the stability of ePMO@Eu\_PA.

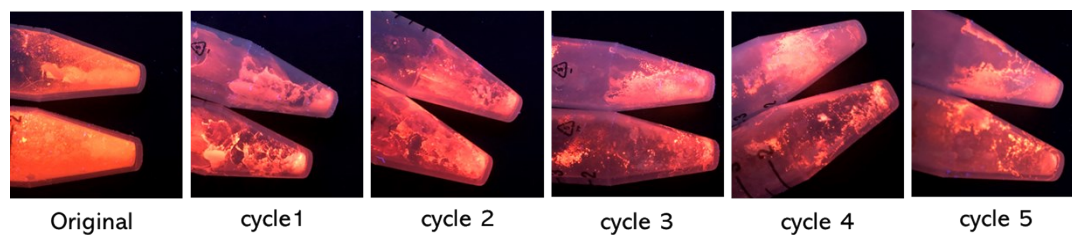

**Figure S11** Photographs taken under a UV lamp (302 nm illumination) of ePMO@Eu\_PA in solid state (top:  $\text{Co}^{2+}$  sensing; bottom: pH sensing, pH values are 7.73, 10.23, 7.73, 10.23 and 7.73 from left to right, corresponding to cycle 1-5, respectively.)

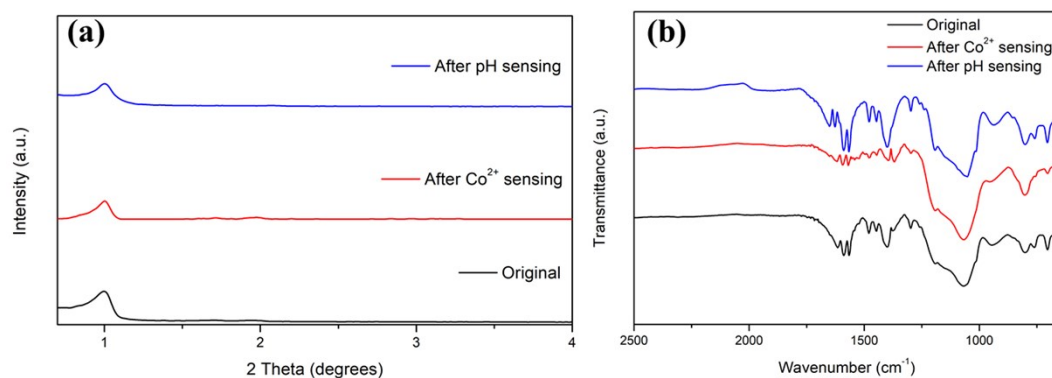

**Figure S12** PXRD patterns and DRIFT spectra of ePMO@Eu\_PA after different treatments.
